# Supplementary material
Source: PubMed Central journal article supplement (PMC9813561)
Supplement: mmc1.pdf [file mmc1.pdf]

SUPPLEMENTARY INFORMATION

**In-Situ Detection of SARS-CoV-2 in Lungs and Airways of Patients with COVID-19**

Inga-Marie Schaefer, M.D.<sup>1</sup>, Robert F. Padera, M.D., Ph.D.<sup>1</sup>, Isaac H. Solomon, M.D., Ph.D.<sup>1</sup>, Sanjat Kanjilal, M.D., M.P.H.<sup>2,3</sup>, Mark M. Hammer, M.D.<sup>4</sup>, Jason L. Hornick, M.D., Ph.D.<sup>1</sup>, and Lynette M. Sholl, M.D.<sup>1</sup>

<sup>1</sup>Department of Pathology, Brigham and Women's Hospital, Harvard Medical School, Boston, MA, USA

<sup>2</sup>Division of Infectious Diseases, Brigham & Women's Hospital, Boston, MA, USA

<sup>3</sup>Department of Population Medicine, Harvard Medical School and Harvard Pilgrim Healthcare Institute, Boston, MA, USA

<sup>4</sup>Department of Radiology, Brigham and Women's Hospital, Harvard Medical School, Boston, MA, USA

**Correspondence:**

Lynette M. Sholl, M.D., Department of Pathology, Brigham and Women's Hospital, 75 Francis Street, Boston, MA 02115, USA; email: [lmsholl@bwh.harvard.edu](mailto:lmsholl@bwh.harvard.edu); phone: (617) 732-7510; fax: (617) 264-5118

SUPPLEMENTARY INFORMATION – Table of Contents

**Supplementary Figures**

- Supplementary Figure 1. SARS immunohistochemical staining in areas of reactive change in lungs from patients 4 and 5 with COVID-19 (SARS-CoV-2 infection).
- Supplementary Figure 2. SARS immunohistochemical staining in intrapulmonary airways from patient 5 with COVID-19 (SARS-CoV-2 infection).

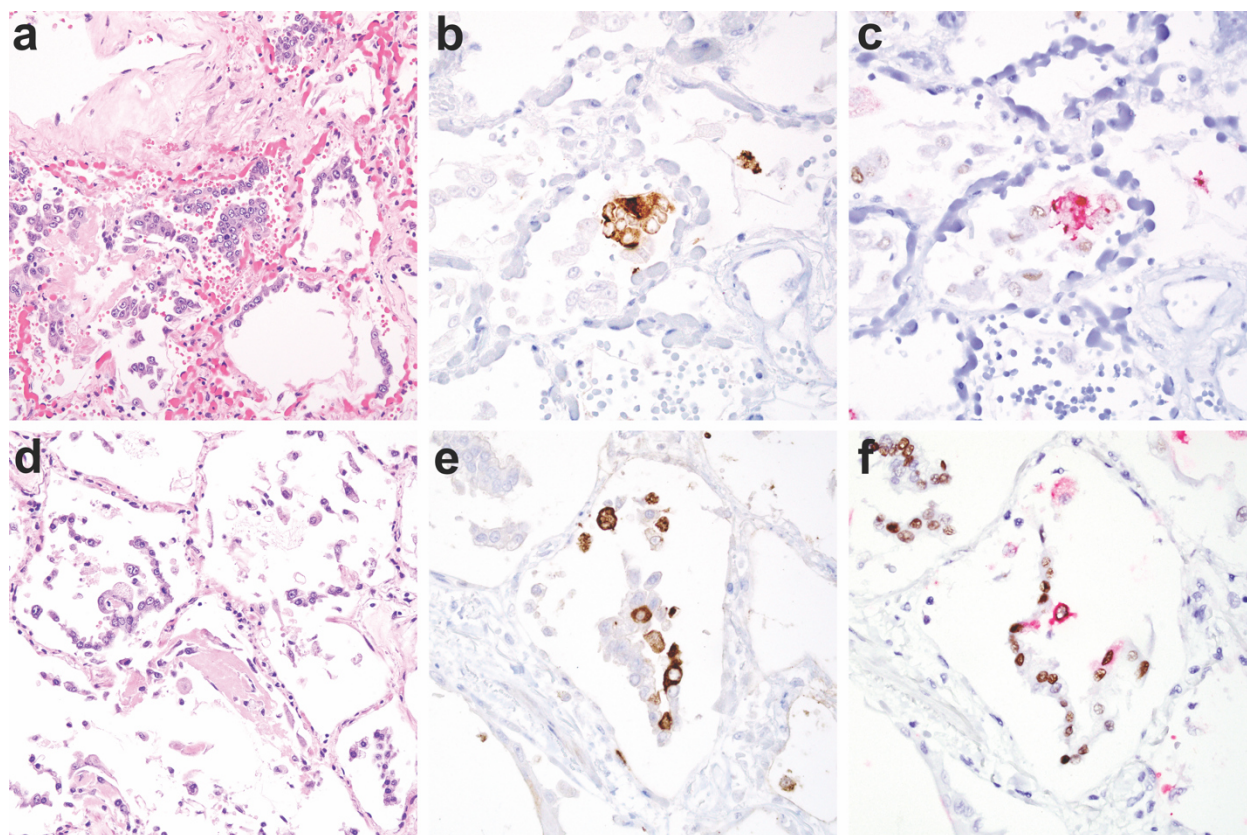

**Supplementary Figure 1. SARS immunohistochemical staining in areas of reactive change in lungs from patients 4 and 5 with COVID-19 (SARS-CoV-2 infection).** Histologic examination of the lungs from patients 4 (**a-c**) and 5 (**d-f**) revealed prominent reactive hyperplasia of alveolar lining cells in patient 4 (**a**) and 5 (**d**). SARS immunohistochemistry (IHC) was positive in these cells as confirmed by SARS single stain (brown reaction product) in patient 4 (**b**) and 5 (**e**) and TTF-1/SARS double labeling in patient 4 (**c**) and 5 (**f**) which demonstrates co-localization of TTF-1 (brown reaction product) and SARS (red reaction product) in reactive pneumocytes.

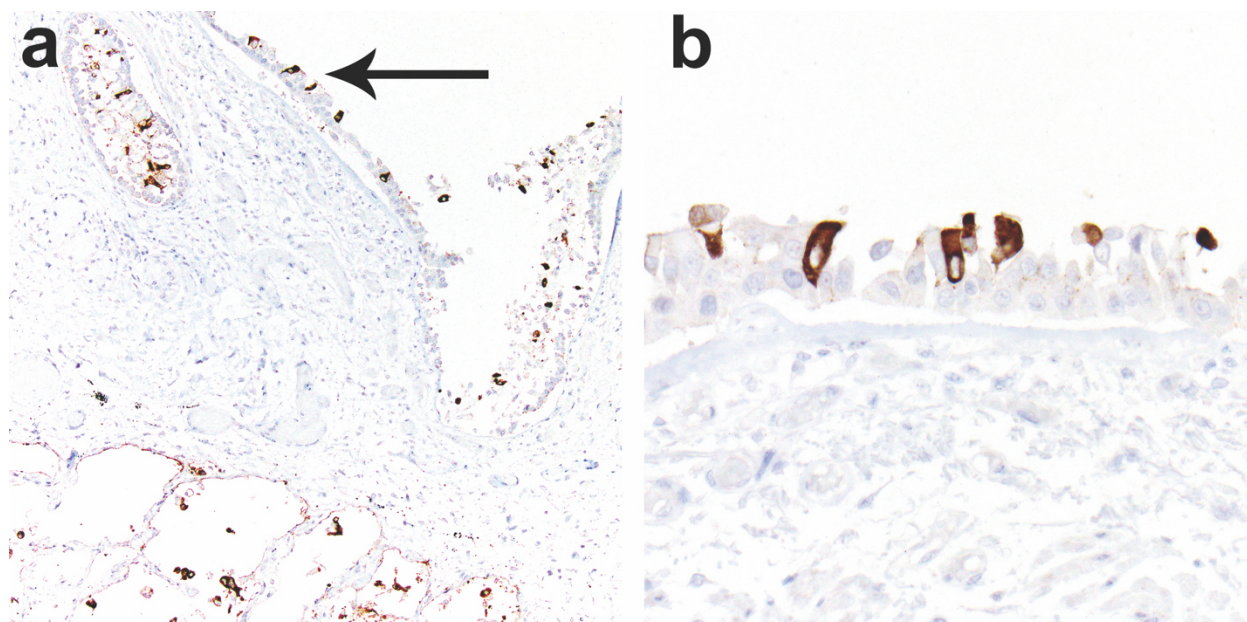

**Supplementary Figure 2. SARS immunohistochemical staining in intrapulmonary airways from patient 5 with COVID-19 (SARS-CoV-2 infection).** SARS immunohistochemistry (IHC) on lung sections shows diffuse strong SARS positivity in bronchial and bronchiolar airways (**a**, arrow), pneumocytes (**a**, bottom), and epithelial cells of submucous glands (**a**, top left). Within intrapulmonary airways, positive SARS IHC staining was detected mostly in ciliated cells (**b**).
